# Supplementary material for: More Rule than Exception: Parallel Evidence of Ancient Migrations in Grammars and Genomes of Finno-Ugric Speakers
Source: PubMed Central journal article supplement (PMC7763979; doi:10.3390/genes11121491), 2020-12-11

**Supplementary Material.**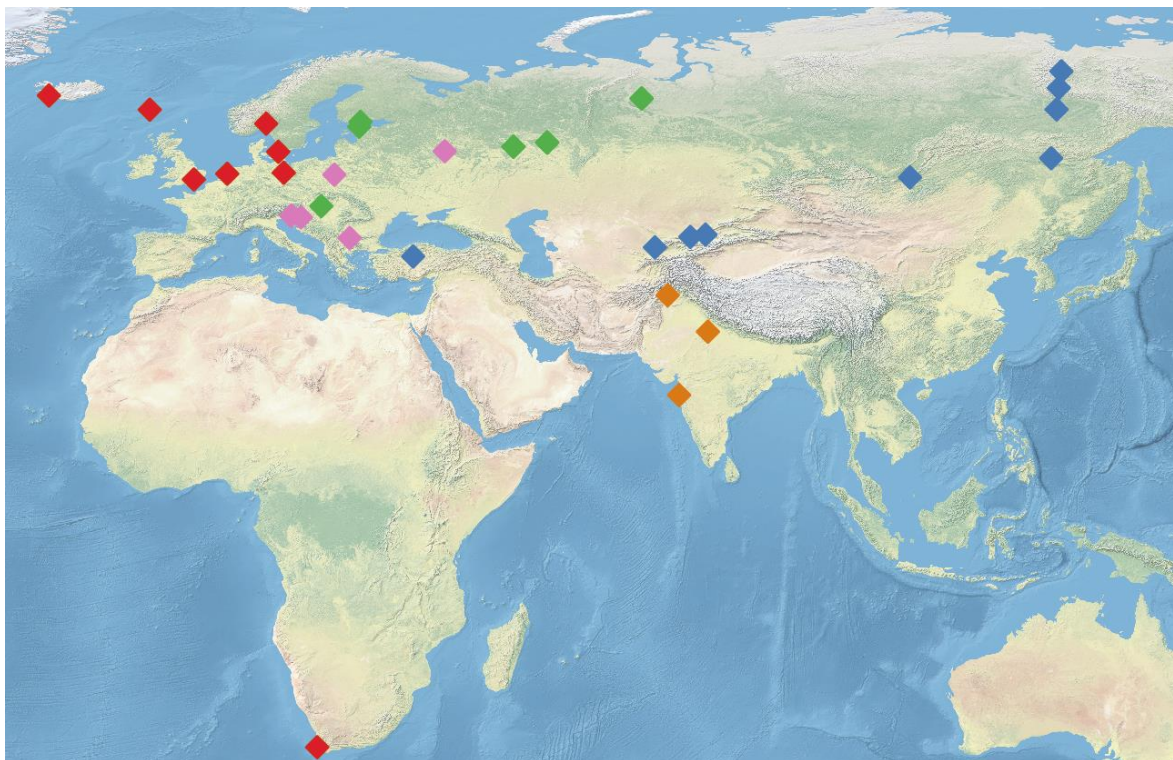

**Supplementary Figure S1.** Approximate geographical location of the 34 languages considered. Thirty-one geographical points; three FU languages, Mari, Udmurt and Khanty, are represented each by two diastatic variants spoken in the same location. Language groups coded as follows: Finno-Ugric (green); Altaic (blue); Germanic (red); Slavic (pink); Indo-Iranian (orange).



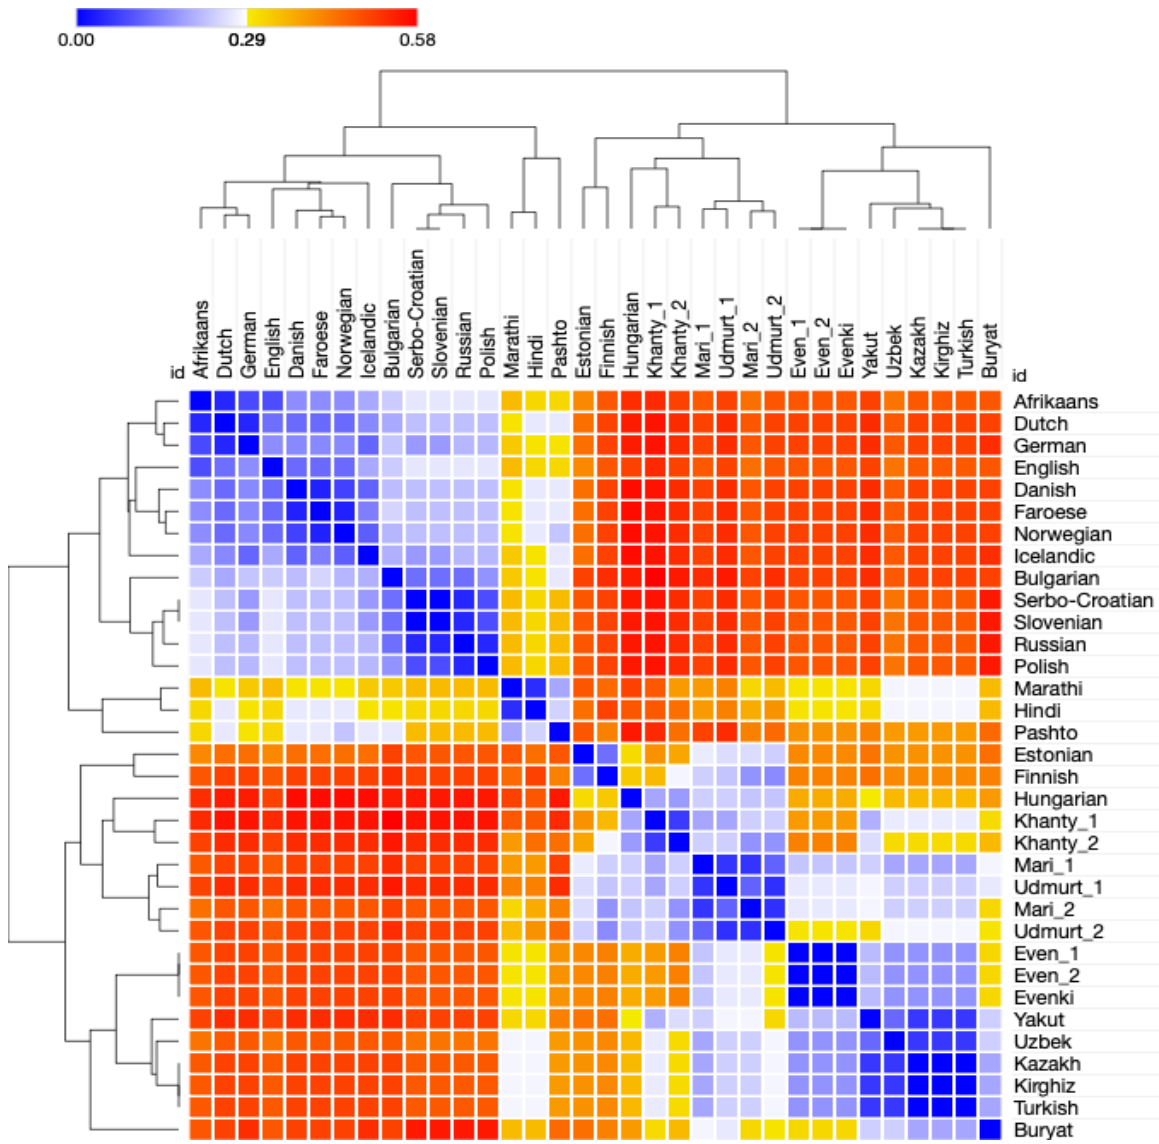

**Supplementary Figure S3.** Heatmap from the syntactic distances. Dark red represents maximum distance, dark blue minimum distance.

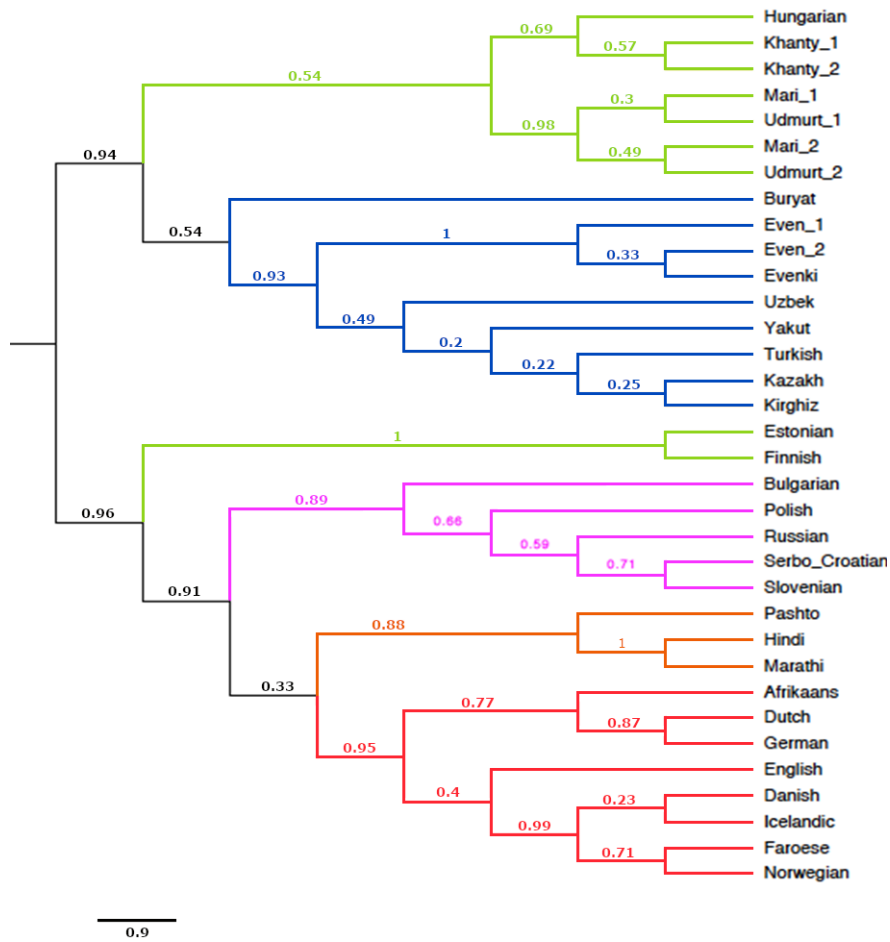

**Supplementary Figure S4.** Bayesian phylogeny (BEAST) from the syntactic dataset. Numbers on the nodes represent the posterior probability. Orange=Indo-Iranian IE, pink=Slavic IE, red=Germanic IE, Blue=AL, Green=FU.

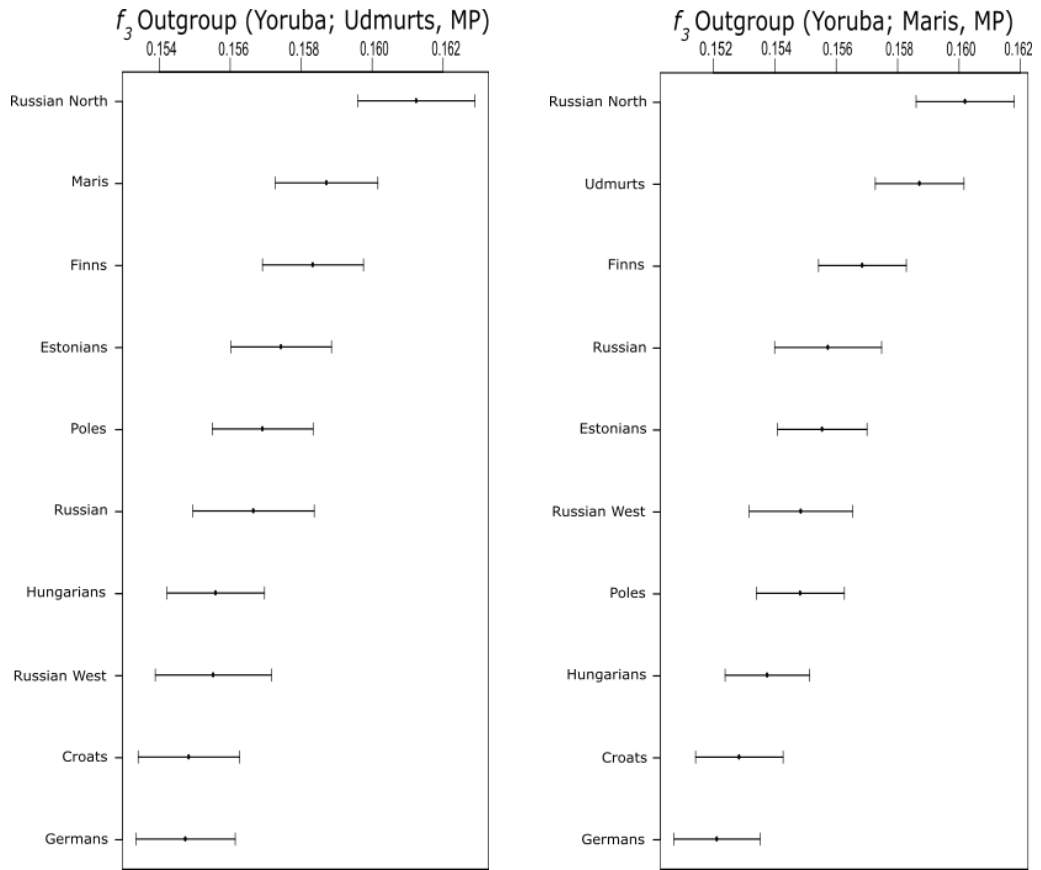

**Supplementary Figure S5.** Outgroup  $f_3$ -statistics analysis. Shared genetic drift between modern Pontic steppes populations and modern European populations (MP).

**Supplementary Table S1.** Whole-genome samples collected for the populations under study.

| Sample Size | Sample ID                 | Populations                     | Country            | Region    | Coverage | Language Family      | Reference                 |
|-------------|---------------------------|---------------------------------|--------------------|-----------|----------|----------------------|---------------------------|
| 3           | Est1, Est2, Est3          | <b>Estonian</b>                 | Estonia            | Europe    | >40      | <b>Uralic</b>        | Pagani <i>et al.</i> 2016 |
| 3           | Fin1, Fin2, Fin3          | <b>Finnish</b>                  | Finland            | Europe    | >40      | <b>Uralic</b>        | Pagani <i>et al.</i> 2016 |
| 3           | Rus1, RusPi1, RusPs2      | <b>Russian (North and West)</b> | Russia             | Europe    | >40      | <b>Indo-European</b> | Pagani <i>et al.</i> 2016 |
| 3           | Pole1, Pole2, Pole3       | <b>Polish</b>                   | Poland             | Europe    | >40      | <b>Indo-European</b> | Pagani <i>et al.</i> 2016 |
| 3           | Hun1, Hun2, Hun4          | <b>Hungarian</b>                | Hungary            | Europe    | >40      | <b>Uralic</b>        | Pagani <i>et al.</i> 2016 |
| 3           | Ger1, Ger2, Ger3          | <b>German</b>                   | Germany            | Europe    | >40      | <b>Indo-European</b> | Pagani <i>et al.</i> 2016 |
| 3           | croat11, croat13, croat12 | <b>Croatian</b>                 | Bosnia-Herzegovina | Europe    | >40      | <b>Indo-European</b> | Pagani <i>et al.</i> 2016 |
| 3           | Iran1, Iran2, Iran3       | <b>Iranian (Farsi)</b>          | Iran               | West Asia | >40      | <b>Indo-European</b> | Pagani <i>et al.</i> 2016 |
| 3           | Mari1, Mari2, Mari3       | <b>Mari</b>                     | Russia             | Europe    | >40      | <b>Uralic</b>        | Pagani <i>et al.</i> 2016 |
| 3           | Udmrd1, Udmrd2, Udmrd3    | <b>Udmurt</b>                   | Russia             | Europe    | >40      | <b>Uralic</b>        | Pagani <i>et al.</i> 2016 |
| 3           | Khant1, Khant2, Khant3    | <b>Khanty</b>                   | Russia             | Siberia   | >40      | <b>Uralic</b>        | Pagani <i>et al.</i> 2016 |
| 3           | Evk2, Evk14, Evk16        | <b>Evenki</b>                   | Russia             | Siberia   | >40      | <b>Altaic</b>        | Pagani <i>et al.</i> 2016 |
| 3           | Bur2, Bur6, Bur11         | <b>Buryat</b>                   | Russia             | Siberia   | >40      | <b>Altaic</b>        | Pagani <i>et al.</i> 2016 |
| 3           | YakS4, YakK1, YakK3       | <b>Yakut</b>                    | Russia             | Siberia   | >40      | <b>Altaic</b>        | Pagani <i>et al.</i> 2016 |
| 3           | EvenM1, EvenM2, EvenM3    | <b>Even</b>                     | Russia             | Siberia   | >40      | <b>Altaic</b>        | Pagani <i>et al.</i> 2016 |

Note: the three Russian individuals come from three different subsets.

**Supplementary Table S2.** Ancient DNA samples used in this study.

| Sample ID | Archaeological Culture | Date             | Country | Region | Contributor                  |
|-----------|------------------------|------------------|---------|--------|------------------------------|
| I1100     | Anatolia_Neolithic     | 6500-6200 calBCE | Turkey  | Barcın | Mathieson <i>et al.</i> 2015 |
| I1102     | Anatolia_Neolithic     | 6500-6200 calBCE | Turkey  | Barcın | Mathieson <i>et al.</i> 2015 |
| I1099     | Anatolia_Neolithic     | 6500-6200 calBCE | Turkey  | Barcın | Mathieson <i>et al.</i> 2015 |
| I1103     | Anatolia_Neolithic     | 6400-5600 calBCE | Turkey  | Barcın | Mathieson <i>et al.</i> 2015 |
| I1101     | Anatolia_Neolithic     | 6400-5600 calBCE | Turkey  | Barcın | Mathieson <i>et al.</i> 2015 |
| I1097     | Anatolia_Neolithic     | 6400-5600 calBCE | Turkey  | Barcın | Mathieson <i>et al.</i> 2015 |
| I0744     | Anatolia_Neolithic     | 6400-5600 calBCE | Turkey  | Barcın | Mathieson <i>et al.</i> 2015 |
| I1579     | Anatolia_Neolithic     | 6500-6200 calBCE | Turkey  | Barcın | Mathieson <i>et al.</i> 2015 |
| I1581     | Anatolia_Neolithic     | 6500-6200 calBCE | Turkey  | Barcın | Mathieson <i>et al.</i> 2015 |
| I1096     | Anatolia_Neolithic     | 6500-6200 calBCE | Turkey  | Barcın | Mathieson <i>et al.</i> 2015 |
| I1580     | Anatolia_Neolithic     | 6500-6200 calBCE | Turkey  | Barcın | Mathieson <i>et al.</i> 2015 |
| I1098     | Anatolia_Neolithic     | 6500-6200 calBCE | Turkey  | Barcın | Mathieson <i>et al.</i> 2015 |
| I1585     | Anatolia_Neolithic     | 6500-6200 calBCE | Turkey  | Barcın | Mathieson <i>et al.</i> 2015 |
| I0708     | Anatolia_Neolithic     | 6500-6200 calBCE | Turkey  | Barcın | Mathieson <i>et al.</i> 2015 |
| I0745     | Anatolia_Neolithic     | 6500-6200 calBCE | Turkey  | Barcın | Mathieson <i>et al.</i> 2015 |
| I0746     | Anatolia_Neolithic     | 6500-6200 calBCE | Turkey  | Barcın | Mathieson <i>et al.</i> 2015 |
| I1583     | Anatolia_Neolithic     | 6500-6200 calBCE | Turkey  | Barcın | Mathieson <i>et al.</i> 2015 |
| I0707     | Anatolia_Neolithic     | 6500-6200 calBCE | Turkey  | Barcın | Mathieson <i>et al.</i> 2015 |
| I0709     | Anatolia_Neolithic     | 6500-6200 calBCE | Turkey  | Barcın | Mathieson <i>et al.</i> 2015 |
| I0725     | Anatolia_Neolithic     | 6500-6200 calBCE | Turkey  | Barcın | Mathieson <i>et al.</i> 2015 |
| I0727     | Anatolia_Neolithic     | 6500-6200 calBCE | Turkey  | Barcın | Mathieson <i>et al.</i> 2015 |
| I0724     | Anatolia_Neolithic     | 6500-6200 calBCE | Turkey  | Barcın | Mathieson <i>et al.</i> 2015 |
| I0736     | Anatolia_Neolithic     | 6500-6200 calBCE | Turkey  | Barcın | Mathieson <i>et al.</i> 2015 |
| I0723     | Anatolia_Neolithic     | 6500-6200 calBCE | Turkey  | Barcın | Mathieson <i>et al.</i> 2015 |

|         |                    |                  |            |                                                         |                              |
|---------|--------------------|------------------|------------|---------------------------------------------------------|------------------------------|
| I0726   | Anatolia_Neolithic | 6500-6200 calBCE | Turkey     | Barcın                                                  | Mathieson <i>et al.</i> 2015 |
| I0231   | Yamnaya            | 2910-2875 calBCE | Russia     | Ekaterinovka, Southern Steppe, Samara                   | Haak <i>et al.</i> 2015      |
| I0357   | Yamnaya            | 3090-2910 calBCE | Russia     | Lopatino I, Sok River, Samara                           | Haak <i>et al.</i> 2015      |
| I0370   | Yamnaya            | 3500-2700 calBCE | Russia     | Ishkinovka I, Eastern Orenburg, Pre-Ural steppe, Samara | Haak <i>et al.</i> 2015      |
| I0429   | Yamnaya            | 3339-2917 calBCE | Russia     | Lopatino I, Sok River, Samara                           | Haak <i>et al.</i> 2015      |
| I0438   | Yamnaya            | 3021-2635 calBCE | Russia     | Luzkhi I, Samara River, Samara                          | Haak <i>et al.</i> 2015      |
| I0439   | Yamnaya            | 3305-2925 calBCE | Russia     | Lopatino I, Sok River, Samara                           | Haak <i>et al.</i> 2015      |
| I0441   | Yamnaya            | 3010-2622 calBCE | Russia     | Kurmanaevka III, Buzuluk, Samara                        | Haak <i>et al.</i> 2015      |
| I0443   | Yamnaya            | 3335-2912 calBCE | Russia     | Grachevka II, Sok_River, Samara                         | Haak <i>et al.</i> 2015      |
| I0444   | Yamnaya            | 3335-2881 calBCE | Russia     | Kutuluk I, Kutuluk River, Samara                        | Haak <i>et al.</i> 2015      |
| RISE386 | Sintashta          | 2298-2045 calBCE | Russia     | Bulanovo                                                | Allentoft <i>et al.</i> 2015 |
| RISE391 | Sintashta          | 2120-1887 calBCE | Kazakhstan | Tanabergen II                                           | Allentoft <i>et al.</i> 2015 |
| RISE392 | Sintashta          | 2126-1896 calBCE | Russia     | Stepnoe VII                                             | Allentoft <i>et al.</i> 2015 |
| RISE394 | Sintashta          | 1949-1754 calBCE | Russia     | Bulanovo                                                | Allentoft <i>et al.</i> 2015 |
| RISE395 | Sintashta          | 1960-1756 calBCE | Russia     | Bol'shekaraganskii                                      | Allentoft <i>et al.</i> 2015 |



**Supplementary Table S3.** Human Origins data on present-day humans used in this study.

| Sample ID | Population | Country | Region               | Contributor                  |
|-----------|------------|---------|----------------------|------------------------------|
| Nov_005   | Nganasan   | Russia  | Central Asia Siberia | Lazaridis <i>et al.</i> 2014 |
| ADR00514  | Nganasan   | Russia  | Central Asia Siberia | Lazaridis <i>et al.</i> 2014 |
| ADR00513  | Nganasan   | Russia  | Central Asia Siberia | Lazaridis <i>et al.</i> 2014 |
| ADR00509  | Nganasan   | Russia  | Central Asia Siberia | Lazaridis <i>et al.</i> 2014 |
| ADR00512  | Nganasan   | Russia  | Central Asia Siberia | Lazaridis <i>et al.</i> 2014 |
| ADR00504  | Nganasan   | Russia  | Central Asia Siberia | Lazaridis <i>et al.</i> 2014 |
| ADR00507  | Nganasan   | Russia  | Central Asia Siberia | Lazaridis <i>et al.</i> 2014 |
| ADR00511  | Nganasan   | Russia  | Central Asia Siberia | Lazaridis <i>et al.</i> 2014 |
| ADR00510  | Nganasan   | Russia  | Central Asia Siberia | Lazaridis <i>et al.</i> 2014 |
| ADR00508  | Nganasan   | Russia  | Central Asia Siberia | Lazaridis <i>et al.</i> 2014 |
| ADR00515  | Nganasan   | Russia  | Central Asia Siberia | Lazaridis <i>et al.</i> 2014 |
| HGDP00774 | Han        | China   | East Asia            | Patterson <i>et al.</i> 2012 |
| HGDP00775 | Han        | China   | East Asia            | Patterson <i>et al.</i> 2012 |
| HGDP00776 | Han        | China   | East Asia            | Patterson <i>et al.</i> 2012 |
| HGDP00777 | Han        | China   | East Asia            | Patterson <i>et al.</i> 2012 |
| HGDP00779 | Han        | China   | East Asia            | Patterson <i>et al.</i> 2012 |
| HGDP00780 | Han        | China   | East Asia            | Patterson <i>et al.</i> 2012 |
| HGDP00781 | Han        | China   | East Asia            | Patterson <i>et al.</i> 2012 |
| HGDP00782 | Han        | China   | East Asia            | Patterson <i>et al.</i> 2012 |
| HGDP00783 | Han        | China   | East Asia            | Patterson <i>et al.</i> 2012 |
| HGDP00784 | Han        | China   | East Asia            | Patterson <i>et al.</i> 2012 |
| HGDP00785 | Han        | China   | East Asia            | Patterson <i>et al.</i> 2012 |
| HGDP00786 | Han        | China   | East Asia            | Patterson <i>et al.</i> 2012 |
| HGDP00811 | Han        | China   | East Asia            | Patterson <i>et al.</i> 2012 |
| HGDP00812 | Han        | China   | East Asia            | Patterson <i>et al.</i> 2012 |
| HGDP00813 | Han        | China   | East Asia            | Patterson <i>et al.</i> 2012 |
| HGDP00814 | Han        | China   | East Asia            | Patterson <i>et al.</i> 2012 |
| HGDP00815 | Han        | China   | East Asia            | Patterson <i>et al.</i> 2012 |
| HGDP00817 | Han        | China   | East Asia            | Patterson <i>et al.</i> 2012 |
| HGDP00818 | Han        | China   | East Asia            | Patterson <i>et al.</i> 2012 |
| HGDP00819 | Han        | China   | East Asia            | Patterson <i>et al.</i> 2012 |
| HGDP00820 | Han        | China   | East Asia            | Patterson <i>et al.</i> 2012 |
| HGDP00821 | Han        | China   | East Asia            | Patterson <i>et al.</i> 2012 |
| HGDP00822 | Han        | China   | East Asia            | Patterson <i>et al.</i> 2012 |
| HGDP00971 | Han        | China   | East Asia            | Patterson <i>et al.</i> 2012 |
| HGDP00972 | Han        | China   | East Asia            | Patterson <i>et al.</i> 2012 |
| HGDP00973 | Han        | China   | East Asia            | Patterson <i>et al.</i> 2012 |
| HGDP00974 | Han        | China   | East Asia            | Patterson <i>et al.</i> 2012 |
| HGDP00975 | Han        | China   | East Asia            | Patterson <i>et al.</i> 2012 |
| HGDP00976 | Han        | China   | East Asia            | Patterson <i>et al.</i> 2012 |

|           |           |        |                      |                                  |
|-----------|-----------|--------|----------------------|----------------------------------|
| HGDP00977 | Han       | China  | East Asia            | Patterson <i>et al.</i> 2012     |
| HGDP01021 | Han       | China  | East Asia            | Patterson <i>et al.</i> 2012     |
| HGDP01023 | Han       | China  | East Asia            | Patterson <i>et al.</i> 2012     |
| HGDP01024 | Han       | China  | East Asia            | Patterson <i>et al.</i> 2012     |
| HGDP00449 | Mbuti     | Congo  | Africa               | Patterson <i>et al.</i> 2012     |
| HGDP00462 | Mbuti     | Congo  | Africa               | Patterson <i>et al.</i> 2012     |
| HGDP00463 | Mbuti     | Congo  | Africa               | Patterson <i>et al.</i> 2012     |
| HGDP00467 | Mbuti     | Congo  | Africa               | Patterson <i>et al.</i> 2012     |
| HGDP00474 | Mbuti     | Congo  | Africa               | Patterson <i>et al.</i> 2012     |
| HGDP00476 | Mbuti     | Congo  | Africa               | Patterson <i>et al.</i> 2012     |
| HGDP00478 | Mbuti     | Congo  | Africa               | Patterson <i>et al.</i> 2012     |
| HGDP00982 | Mbuti     | Congo  | Africa               | Patterson <i>et al.</i> 2012     |
| HGDP00984 | Mbuti     | Congo  | Africa               | Patterson <i>et al.</i> 2012     |
| HGDP01081 | Mbuti     | Congo  | Africa               | Patterson <i>et al.</i> 2012     |
| HGDP00995 | Karitiana | Brazil | America              | Patterson <i>et al.</i> 2012     |
| HGDP00999 | Karitiana | Brazil | America              | Patterson <i>et al.</i> 2012     |
| HGDP01001 | Karitiana | Brazil | America              | Patterson <i>et al.</i> 2012     |
| HGDP01003 | Karitiana | Brazil | America              | Patterson <i>et al.</i> 2012     |
| HGDP01006 | Karitiana | Brazil | America              | Patterson <i>et al.</i> 2012     |
| HGDP01010 | Karitiana | Brazil | America              | Patterson <i>et al.</i> 2012     |
| HGDP01012 | Karitiana | Brazil | America              | Patterson <i>et al.</i> 2012     |
| HGDP01013 | Karitiana | Brazil | America              | Patterson <i>et al.</i> 2012     |
| HGDP01014 | Karitiana | Brazil | America              | Patterson <i>et al.</i> 2012     |
| HGDP01015 | Karitiana | Brazil | America              | Patterson <i>et al.</i> 2012     |
| HGDP01018 | Karitiana | Brazil | America              | Patterson <i>et al.</i> 2012     |
| HGDP01019 | Karitiana | Brazil | America              | Patterson <i>et al.</i> 2012     |
| U15       | Ulchi     | Russia | Central Asia Siberia | Rem Sukernik / Stanislav Dryomov |
| U131      | Ulchi     | Russia | Central Asia Siberia | Rem Sukernik / Stanislav Dryomov |
| U165      | Ulchi     | Russia | Central Asia Siberia | Rem Sukernik / Stanislav Dryomov |
| U16       | Ulchi     | Russia | Central Asia Siberia | Rem Sukernik / Stanislav Dryomov |
| U133      | Ulchi     | Russia | Central Asia Siberia | Rem Sukernik / Stanislav Dryomov |
| U171      | Ulchi     | Russia | Central Asia Siberia | Rem Sukernik / Stanislav Dryomov |
| U110      | Ulchi     | Russia | Central Asia Siberia | Rem Sukernik / Stanislav Dryomov |
| U143      | Ulchi     | Russia | Central Asia Siberia | Rem Sukernik / Stanislav Dryomov |
| U172      | Ulchi     | Russia | Central Asia Siberia | Rem Sukernik / Stanislav Dryomov |
| U144      | Ulchi     | Russia | Central Asia Siberia | Rem Sukernik / Stanislav Dryomov |
| U174      | Ulchi     | Russia | Central Asia Siberia | Rem Sukernik / Stanislav Dryomov |
| U119      | Ulchi     | Russia | Central Asia Siberia | Rem Sukernik / Stanislav Dryomov |
| U124      | Ulchi     | Russia | Central Asia Siberia | Rem Sukernik / Stanislav Dryomov |
| U159      | Ulchi     | Russia | Central Asia Siberia | Rem Sukernik / Stanislav Dryomov |
| U156      | Ulchi     | Russia | Central Asia Siberia | Rem Sukernik / Stanislav Dryomov |
| U155      | Ulchi     | Russia | Central Asia Siberia | Rem Sukernik / Stanislav Dryomov |
| U116      | Ulchi     | Russia | Central Asia Siberia | Rem Sukernik / Stanislav Dryomov |

|          |       |        |                      |                                  |
|----------|-------|--------|----------------------|----------------------------------|
| UI69     | Ulchi | Russia | Central Asia Siberia | Rem Sukernik / Stanislav Dryomov |
| UI1      | Ulchi | Russia | Central Asia Siberia | Rem Sukernik / Stanislav Dryomov |
| UI36     | Ulchi | Russia | Central Asia Siberia | Rem Sukernik / Stanislav Dryomov |
| UI25     | Ulchi | Russia | Central Asia Siberia | Rem Sukernik / Stanislav Dryomov |
| UI52     | Ulchi | Russia | Central Asia Siberia | Rem Sukernik / Stanislav Dryomov |
| UI70     | Ulchi | Russia | Central Asia Siberia | Rem Sukernik / Stanislav Dryomov |
| UI51     | Ulchi | Russia | Central Asia Siberia | Rem Sukernik / Stanislav Dryomov |
| UI39     | Ulchi | Russia | Central Asia Siberia | Rem Sukernik / Stanislav Dryomov |
| mixe0029 | Mixe  | Mexico | America              | William Klitz / Cheryl Winkle    |
| mixe0030 | Mixe  | Mexico | America              | William Klitz / Cheryl Winkle    |
| mixe0015 | Mixe  | Mexico | America              | William Klitz / Cheryl Winkle    |
| mixe0035 | Mixe  | Mexico | America              | William Klitz / Cheryl Winkle    |
| mixe0018 | Mixe  | Mexico | America              | William Klitz / Cheryl Winkle    |
| mixe0026 | Mixe  | Mexico | America              | William Klitz / Cheryl Winkle    |
| mixe0027 | Mixe  | Mexico | America              | William Klitz / Cheryl Winkle    |
| mixe0028 | Mixe  | Mexico | America              | William Klitz / Cheryl Winkle    |
| mixe0007 | Mixe  | Mexico | America              | William Klitz / Cheryl Winkle    |
| mixe0009 | Mixe  | Mexico | America              | William Klitz / Cheryl Winkle    |

**Supplementary Table S4.** Statistics of the *qpAdm* models.

| Test          | Outgroup set                          | Nganasan | Yamnaya | Anatolia | chi-square |
|---------------|---------------------------------------|----------|---------|----------|------------|
| Khanty        | Han, Mbuti, Karitiana, Ulchi and Mixe | 0.521    | 0.479   | 0        | 10.056     |
| Maris         | Han, Mbuti, Karitiana, Ulchi and Mixe | 0.281    | 0.465   | 0.254    | 10.493     |
| Udmurts       | Han, Mbuti, Karitiana, Ulchi and Mixe | 0.261    | 0.611   | 0.128    | 9.032      |
| Iranians      | Han, Mbuti, Karitiana, Ulchi and Mixe | 0.016    | 0.141   | 0.843    | 7.053      |
| Finns         | Han, Mbuti, Karitiana, Ulchi and Mixe | 0.101    | 0.589   | 0.31     | 6.623      |
| Estonians     | Han, Mbuti, Karitiana, Ulchi and Mixe | 0.04     | 0.568   | 0.391    | 8.095      |
| Hungarians    | Han, Mbuti, Karitiana, Ulchi and Mixe | 0.032    | 0.412   | 0.556    | 8.398      |
| Russian North | Han, Mbuti, Karitiana, Ulchi and Mixe | 0.144    | 0.571   | 0.284    | 2.255      |
| Russian       | Han, Mbuti, Karitiana, Ulchi and Mixe | 0.042    | 0.517   | 0.441    | 5.389      |
| Russian West  | Han, Mbuti, Karitiana, Ulchi and Mixe | 0.035    | 0.526   | 0.440    | 0.819      |
| Croats        | Han, Mbuti, Karitiana, Ulchi and Mixe | 0.042    | 0.303   | 0.655    | 4.373      |
| Germans       | Han, Mbuti, Karitiana, Ulchi and Mixe | 0.027    | 0.373   | 0.6      | 5.999      |
| Poles         | Han, Mbuti, Karitiana, Ulchi and Mixe | 0.023    | 0.561   | 0.416    | 2.634      |

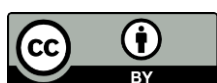

Supplement: genes-11-01491-s001.pdf [file genes-11-01491-s001.pdf]
